# Supplementary material for: Functional Comparison of Three Chitinases from Symbiotic Bacteria of Entomopathogenic Nematodes
Source: MDPI journal article supplement (doi:10.3390/toxins16010026), 2024-01-03
Supplement: s1 [file s1]

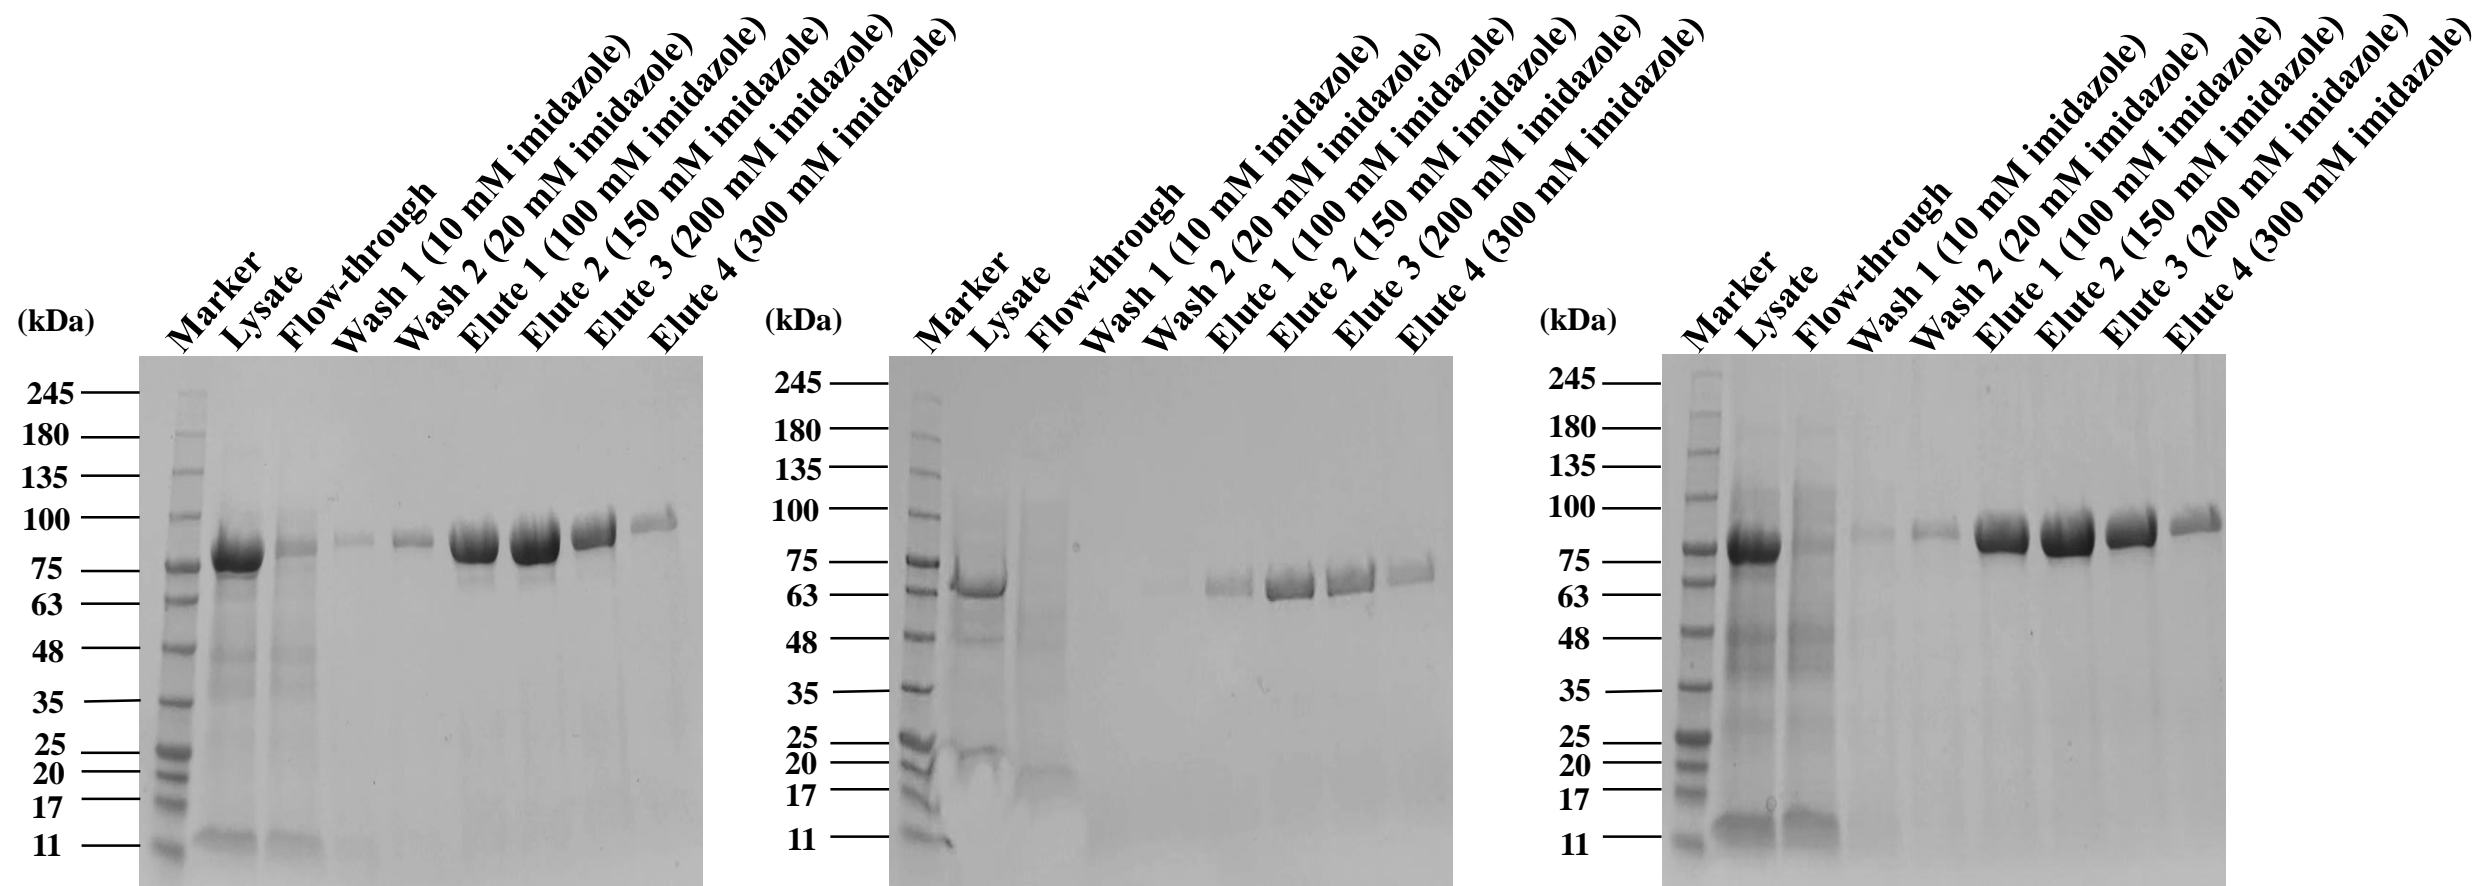

**Figure S1.** Cell lysate, a soluble fraction containing 6xHis-tagged chitinase protein, was purified using an imidazole concentration-dependent method using Ni-NTA superflow resin. Purified chitinase protein were analyzed by 4–15% SDS–PAGE, respectively. From the left, XnChi, XhChi, and PtChi are shown.

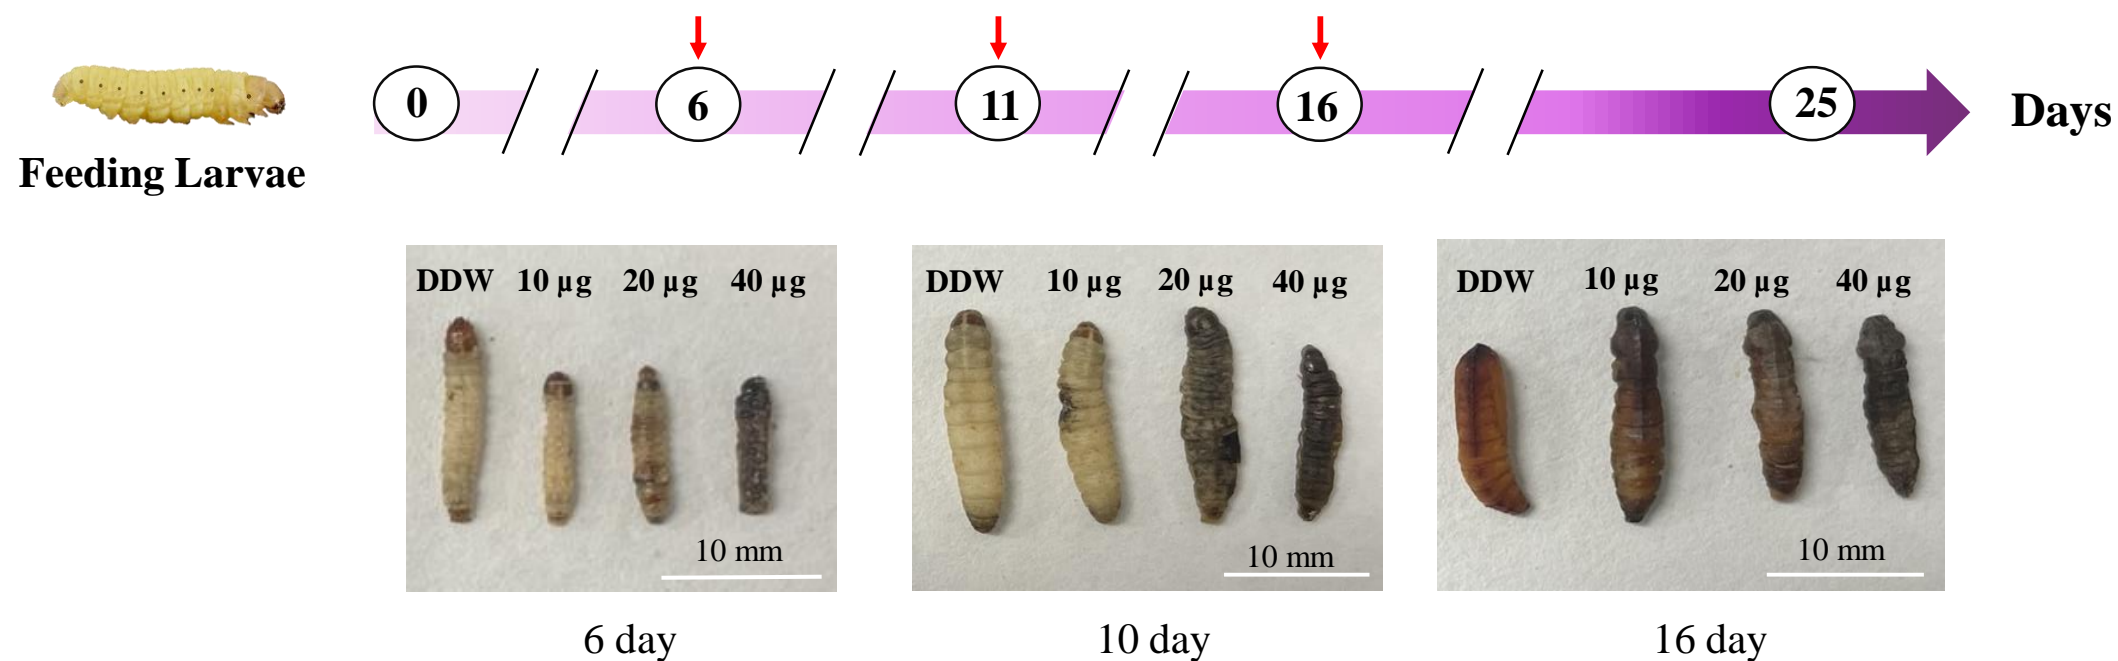

**Figure S2.** Oral toxicity of XnChi, XhChi, and PtChi against *G. mellonella* was observed on 25 days after treatment. The photograph represents XnChi and the arrow indicates the date of photograph taken. White bar indicates the size of larva and larval length was corrected through the image J program.

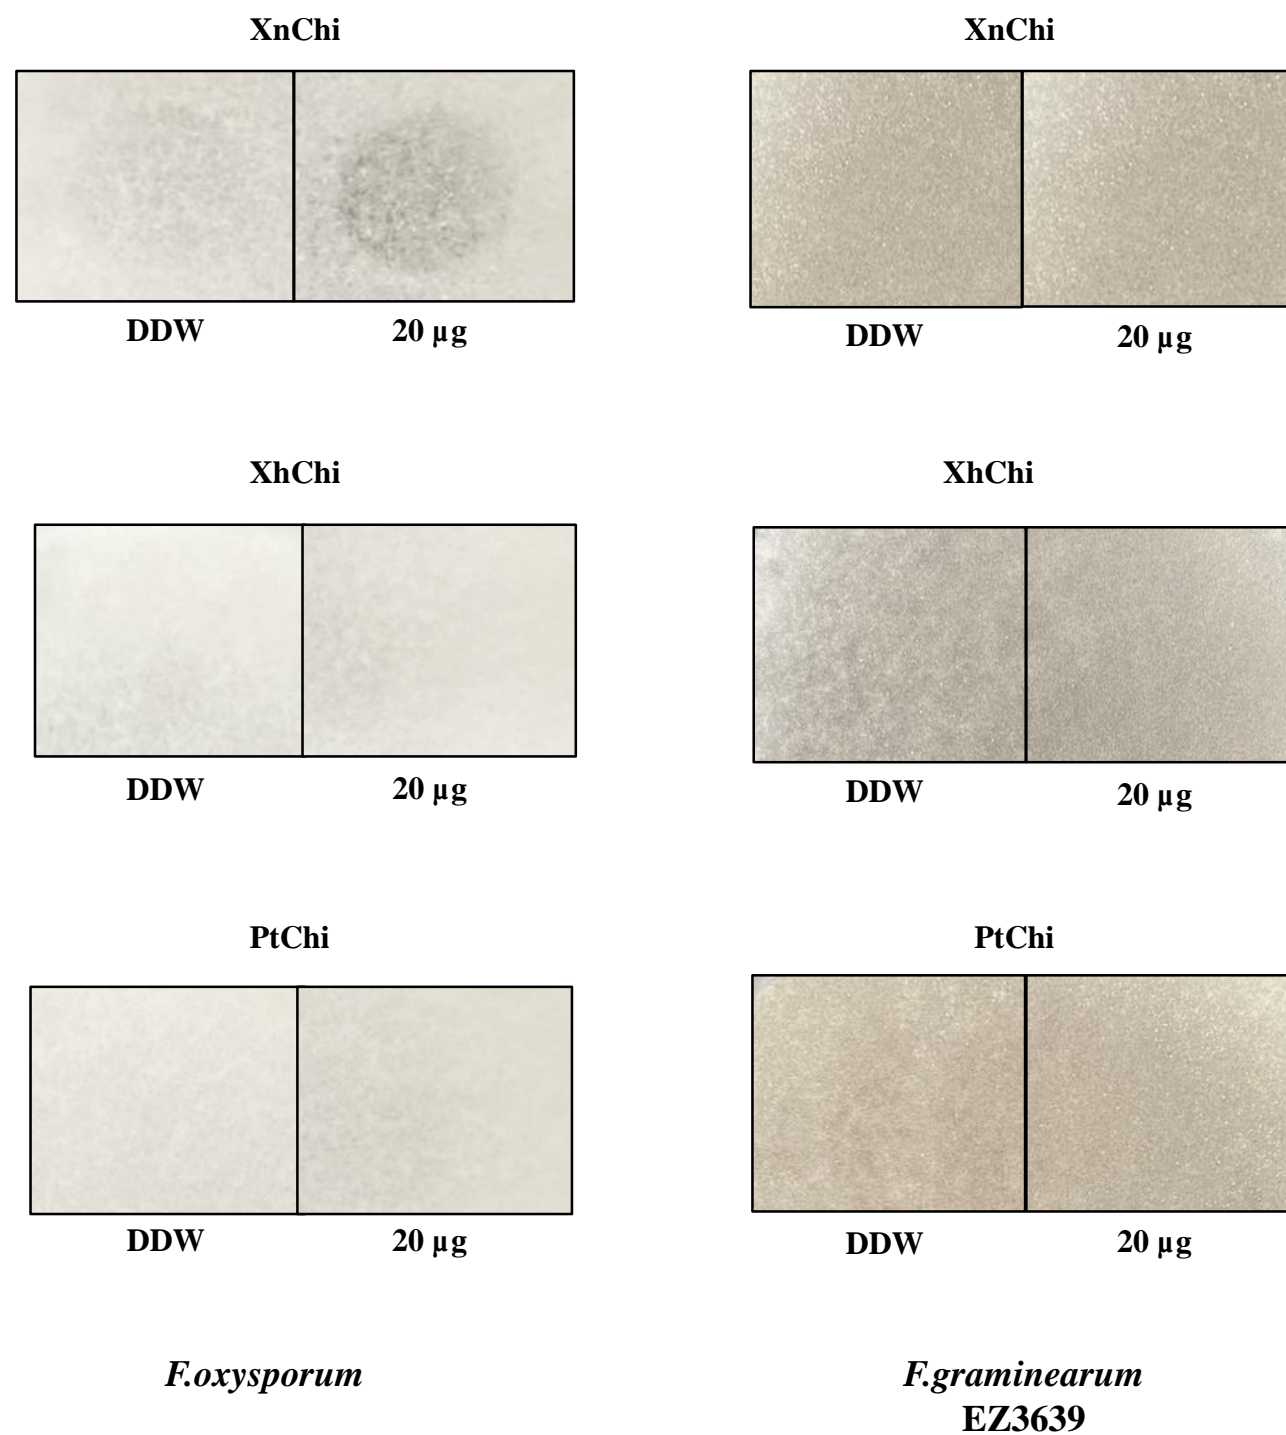

**Figure S3.** Antifungal activity of XnChi, XhChi, and PtChi (20 µg) against *F. oxysporum* and *F. graminearum*.

Inhibition of mycelial growth by chitinases was shown as a inhibition zone by disc diffusion susceptibility assay. As a control, DDW was used, and no growth inhibition was observed.

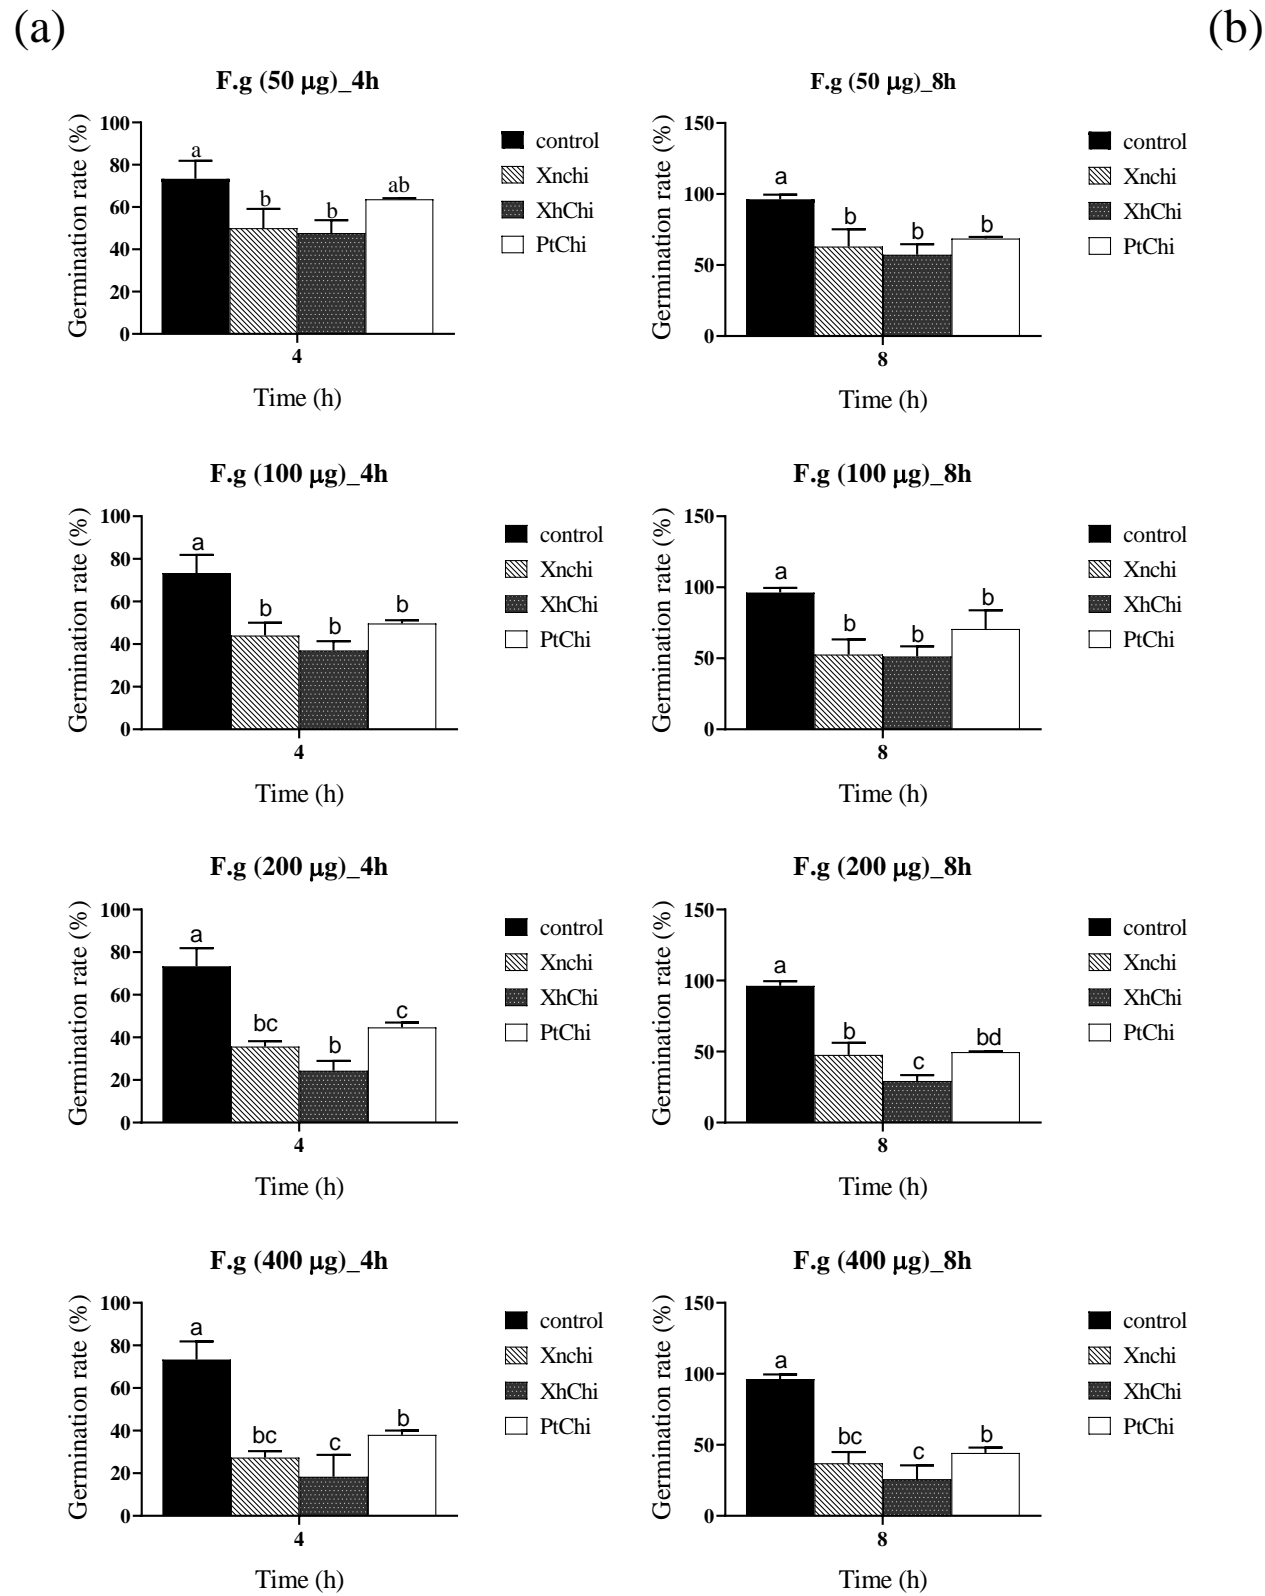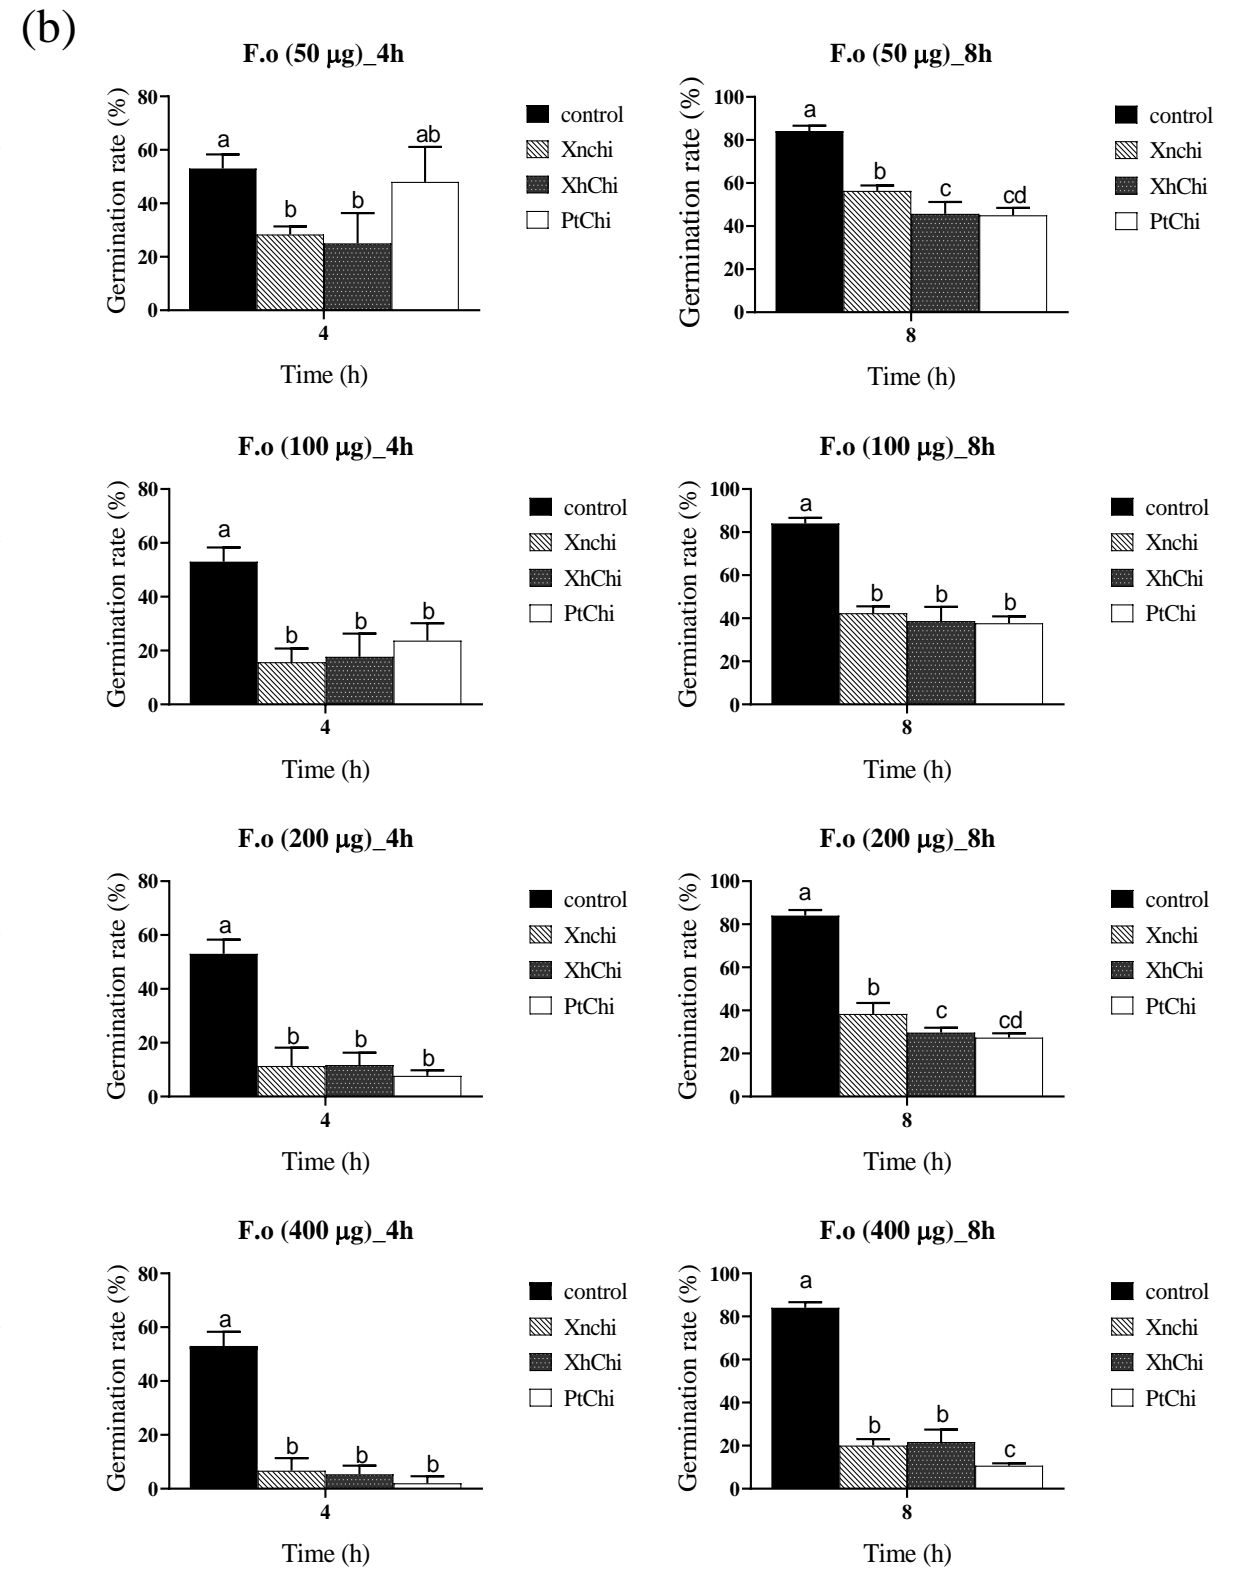

**Figure S4.** Effect of chitinase on conidial germination of *F.graminearum* (a) and *F.oxysporum* (b). Conidia were inoculated into PDB medium supplemented with or without chitinase in coculture system. Turkey's test was used as *post hoc* method to identify concentration and time of high antifungal activity that showed significant differences.

**Table S1.** Primer used in the study

| Primer                                      | Sequences (5' → 3')                                          |
|---------------------------------------------|--------------------------------------------------------------|
| <i>X.nem</i> chitinase-FW ( <i>Sac I</i> )  | <u>GAGCTC</u> ATGTCTCAAAATGTTTATCGATACCC <sup>1</sup>        |
| <i>X.nem</i> chitinase-RV ( <i>Xba I</i> )  | <u>TCTAGAC</u> TACGATTTACGACGGGTAC <sup>1</sup>              |
| <i>X.homi</i> chitinase-FW ( <i>Sac I</i> ) | <u>GAGCTC</u> ATGTCCAAGTTAACTCAAATAGATCCA <sup>1</sup>       |
| <i>X.homi</i> chitinase-RV ( <i>Sal I</i> ) | <u>GTCGAC</u> TTATTTGCTTGTTTTCCCTTTATAATAGAAAGG <sup>1</sup> |
| <i>P.tem</i> chitinase-FW ( <i>Sac I</i> )  | <u>GAGCTC</u> ATGACTGATAACAGTAAATATCAATATACCTGC <sup>1</sup> |
| <i>P.tem</i> chitinase-RV ( <i>Pst I</i> )  | <u>CTGCAG</u> TTACTTTTTTACGGGAATTAACATCAGG <sup>1</sup>      |

<sup>1</sup> The underlined part represents the enzyme cleavage sites.

**Table S2.** Amino acid sequences of chitinases of type strain used in the study

| Strain name                                  | Protein name                            | GeneBank access | Sequence                                                                                                                                                                                                                                                                                                                                                                                                                                                                                                                                                                                                                                                                                                      |
|----------------------------------------------|-----------------------------------------|-----------------|---------------------------------------------------------------------------------------------------------------------------------------------------------------------------------------------------------------------------------------------------------------------------------------------------------------------------------------------------------------------------------------------------------------------------------------------------------------------------------------------------------------------------------------------------------------------------------------------------------------------------------------------------------------------------------------------------------------|
| <i>Xenorhabdus nematophila</i><br>ATCC 19061 | Glycosyl hydrolase<br>family 18 protein | WP 010846090.1  | MSQNVYRYPSIKAMSDASSEVGASLVAWQNNQSGGQTWYVIYDSAVFKNIGWVERWHIPDRNISPDLPVY<br>ENAWQYVREATPEEIADHGNPNTPDVPPGEKTEVLQYDALTEETYQKVGYKPDGSGTPLSYSSARVAKSL<br>YNEYEVDPENTEPLPKVSAYITDWCQYDARLSPETQDNTALTSDDAPGRGFDLEKIPPTAYDRLIFSMAV<br>NGDKGKLSERINEVVDGWNRQAEASSGQIAPITLGHIVPVDPYGDLGTTRNVGLDADQRRDASPKNFLQ<br>YYNQDAASGLLGGLRNLKARAKQAGHKLELAFSIGGWSMSGYFSVMAKDPEQRATFVSSIVDFFRRFP<br>MFTAVDIDWEYPGATGEEGNEFDPEHDGPNYVLLVKELREALNIAFGTRARKEITIACSAVVAKMEKSSFK<br>EIAPYLDNIFVMTYDFFGTGWAHEYIGHHTNLNYPPEYDGDNPPPPNPDRDMDYSADAEIRFLLSQGVQP<br>EKIHLGFANYGRSCLGADLTTRRYNRTGEPLGTMEKGAPEFFCLLNNQYDAEYEIARGKNQFELVTDTET<br>DADALFNADGGHWISLDTPRTVLHKGIYATKMKLGGIFSWSGDQDDGLLANAAHEGLGYLPVRGKEKID<br>MGP LYNKGRLIQLPKVTRRKS |
| <i>Xenorhabdus hominickii</i><br>ANU1        | Glycosyl hydrolase<br>family 18 protein | WP 010846090.1  | MSKLTQIDPLSEESYRLDHFNPATETTKFSYTSGRVSLPVYNKYNVKNKPKVIGYYTDWSQYDSRLQGNQ<br>TPSARGRGIDLQHFLDNPFAYDKLIIGFCGILGDKGEKGSLSIRAAPKFARYNNGEVTFTDEWGCQSYVN<br>CTFPKWQDIQMPRDFNQAKAMGILGGLAKVQGAACAQGHDLAMSFSVGGWTMSNGFYNMVRDKKLK<br>SSFISSLIDIFNRPFMFTEVDIDWEYPGASGNNNPDDKDGEEYISLISDLSTEFKSAGRSDIKISIACSAVPA<br>VMEKSRIPELLNAGLYGINVMTYDFFGTPWANKLMHHTNLRRYPGSENSVEKAVEYLLSVGVPSQAINIG<br>YAGYSRNAKNVDITNYSPLSGSYHPGNGTTTGTTFESGSTEWYDTIYNYLDLESRKDRNLFTLYTDEVADA<br>DYLYNSSSKLFLSIDTPRTVKAKAKYALEKNLGGVFTWTADQDRGLLVNAAREGLECPLLIKIDMAPFY<br>YKGKTSK                                                                                                                                                                  |
| <i>Portorhabdus temperata</i><br>J3          | Glycosyl hydrolase<br>family 18 protein | WP 023045972.1  | MTDNSKYQYTCKKVMSDASENIGAPLTAWSNQSGGETYYVIFDGQVYKNTYWVERWHIPQRDNTPSYE<br>NAWSWVRAATAEEIAKHGNPKESTVKPIPGDVAILKPDALTEETYQKEGYKPDGSGTNLAYTSARVCHSL<br>YNQYETDRTRPKVSAYITDWCQYDARLPPASKDSKDNEDGPGRGFNLADIPATAYDRLVFSFLGIYGDKG<br>SKKDRINLSAEGWNLQLRPEDPPITFGHIVPVDPYGDLGTTRNVGLPKEDTRDAGPNTFLPFYNQQAASG<br>LLGGLRNLQQAKLAGHRLELAFSIGGWSMSGYFSPMLKDDAQRKTFIDSIVDFFQRFPMFTAVDIDWEY<br>PGAAGEVGNEFDPENDGPNYAILIKLRQALDCAFGTSARKQITIASSAVVGKLKKSNIKELIHNGLDNIFV<br>MTYDFFGNGWAKHIGHHTNLYSAPYASDDPNRDYDISSDEAIKYLIEVEGVPPGKIHLGFANYGRSCIGAD<br>LKTRQYNRNPANPAPALGTMENGAPEFFCLLNNQFDCEQQLAWAKNGFKLMTDTATDADFLYNSTGGHF<br>ISLDTPRTVFKKGIYATEHKLGGIFSWSGDQDCGLLANAAREGAGYIPIKGKEKIDMGPLYNRGELVELPD<br>VNSRKK               |

**Table S3.** Amino acid sequences of chitinases used in study

| Strain name                             | Protein name | GeneBank access | Sequences                                                                                                                                                                                                                                                                                                                                                                                                                                                                                                                                                                                                                                                                                             |
|-----------------------------------------|--------------|-----------------|-------------------------------------------------------------------------------------------------------------------------------------------------------------------------------------------------------------------------------------------------------------------------------------------------------------------------------------------------------------------------------------------------------------------------------------------------------------------------------------------------------------------------------------------------------------------------------------------------------------------------------------------------------------------------------------------------------|
| <i>Xenorhabdus nematophila</i><br>GJ1-2 | XnChi        | OR724704        | MSQNVYRYPsikamsdasEVgaslVawqNQSGGQTWYVIYDSAVfKNIGWVERWHIPDRNISPDLPVYENAWQ<br>YVREATPEEIADHGPNPTPDVPPGEKTEVLQYDALTEETYQKVGYPDGSGTPLSYSSARVAKSLYNEYEVDPEN<br>TEPLKVSAYITDWCQYDARLSPETQDNTALTSDDAPGRGFDLEKIPPTAYDRLIFSfMAVNGDKGKLSERINEVV<br>DGWNRQAEASSGQIAPITLGHIVPVDPYGDLGTTRNVGLDADQRRDASPKNFLQYYNQDAASGLLGGLRNlKA<br>RAKQAGHKLELAfSIGGWSMSGYfSVMAKDPEQRATfVSSIVDFRRfPMFTAVIDIDWEYPGATGEEGNEFDPEH<br>DGPNYVLLVKELREALNIAFGTRARKEITIACSAVVAkMEKSSfKEIAPYLDNIFVMtyDFFGTGWAEYIGHHTNL<br>YPPRYEYDGDNPPPPNPDRDMDYSADEAIRfLLSQGVQPEKIHLGFANYGRSCLGADLTTRRYNRTGEPLGTMEK<br>GAPEFFCLLNNQYDAEYEIARGKNQfELVTDtETDADALFNADGGHWISLDTPrTVLHKGIYATKMKLGgIFSWs<br>GDQDDGLLANAAHEGLGYLPVRGKEKIDMGPLYNKGRlIQLPKVTRRKS |
| <i>Xenorhabdus hominickii</i><br>GJ11-1 | XhChi        | OR724706        | MSKLTQIDPLSEESYRLDHfNPATETTKfSYTSGRVSLPVYNKYNVKNKPKVIGYYTDWSQYDSRLQGNQTPSAR<br>GRGIDLQHFLDNPFAYDKLIIGFCGILGDKGEKGSliSRAAPKFARYNNGEVtFTDEWGDcQSYVNCTfPKWQDIQ<br>MPRDFNQAKAMGILGGLAKVQGAAKAQGHDLAMSfSVGGWTMSNGfYNMVRDKKLKSSfISSliDIFNRfPMf<br>TEVIDIDWEYPGASGNPNPHDDKDGEYYISlIRDLSMEfKSAGRSDIKISIACSAVPAVMEKSRIPELLNAGLYGINV<br>MTYDFFGTPWANKLMHHTNLRRYPGSENSVEKAVEYLLSVGVPSQAINIGYAGYSRNAKNVDITNYSPLSGSYHP<br>NGGTTTGTfESGSTEWYDTIYNyLDLESRKDRNLfTLyTDEVADADYlNssSKLFLSIDTPRTVKAKAKYALEK<br>NLGGVFTWTADQDRGLLVNAAREGLECPllIKKIDMAPfYYKGKTSK                                                                                                                                                            |
| <i>Portorhabdus temperata</i><br>GJ1-2  | PtChi        | OR724705        | MTDNSKYQYTCKKVMsDASENIGAPLTAWSNQSGGETYYVIFDGQVYKNTYWVERWHIPQRDNTPSYENAWs<br>WVRAATAEEIAKHGNPKESTVKPIPGDVAILKPDALTEETYQKEGYKPDGSGTNLAYTSARVCHSLYNQYETDRT<br>RPKVSAYITDWCQYDARLPPASKDSdKNEDGPGRGFNLADIPATAYDRLVfSFLGIYGDKGSKKDRINLSAEGWN<br>KQLRPEDPPITFGHIVPVDPYGDLGTTRNVGLPKEDTRDAGPNtFLPFYNQQAASGLLGGLRNlQQAKLAGHRL<br>ELAfSIGGWSMSGYfSPMLKDDAQRKtFIDSIVDFfQRfPMFTAVIDIDWEYPGAAGEVGNEFDPENDGPNYAILIK<br>KLRQALDCAFGTSARKQITIASSAVVGKLKKSNIKELIHNGLDNIFVMtyDFFGNGWAKHGHHTNLySAPYASDD<br>PNRDYDISSDEAIKYLIEVEGVPPGKIHLGFANYGRSCIGADLKTRQYNRNpANPAPALGTmENGAPEFFCLLNNQ<br>FDCEQQLAWAKNGfKLMTDTATDADfLYNSTGGHfISLDTPrTVfKKGIYATEHKLGgIFSWSGDQDCGLLANAA<br>REGAGYIPIKGKEKIDMGPLYNRGELVELPDVNSRKK          |

**Table S4.** Amino acid sequences of chitinases used in multiple sequence alignment analysis.

| Strain name                             | Protein name                            | GeneBank access | Sequence                                                                                                                                                                                                                                                                                                                                                                                                                                                                                                                                                                                                                                                                                                  |
|-----------------------------------------|-----------------------------------------|-----------------|-----------------------------------------------------------------------------------------------------------------------------------------------------------------------------------------------------------------------------------------------------------------------------------------------------------------------------------------------------------------------------------------------------------------------------------------------------------------------------------------------------------------------------------------------------------------------------------------------------------------------------------------------------------------------------------------------------------|
| <i>Yersinia entomophaga</i><br>MH96     | Glycosyl hydrolase<br>family 18 protein | ANI28952.1      | MESEMEKEEKSNIYDKDPGYVWDNKNECEGAAEETYQELNYEPSISADKLTWTPTRLAKTVFNTYEDD<br>DDFNVLCYFTDWSQYDPRIINKEIRDGTGGRSADILRLNTPDGRPFKRLIYSFGGLIGDKKYSADGNASIAVR<br>LGVATDPDDAIANHKGKTIPVDPDGAVLASINCGFTKWEAGDANERYNQEKAKGLLGGFRLLHEADKEL<br>EFSLSIGGWSMSGLFSEIAKDEILRTNFVEGIKDDFFQRFPMFSLHDIDWEYPGSIGAGNPNSPDDGANFAILI<br>QQITDAKISNLKGISIASSADPAKIDAANIPALMDAGVTGINLMTYDFFTLGDGKLSHHTNIYRDPSDVYSK<br>YSIDDAVTHLIDEKKVDPKAIFIGYAGYTRNAKNATITTSIPSEEALKGTYTDANQTLGSFEYSVLEWTDIIC<br>HYMDFEKGEGRNGYKLVHDKVAKADYLYSEATKVFISLDTPRSVRDKGRYVKDKKGLGGLFIWSGDQDN<br>GILTNAHEGLKRRIKNKVIDMTPFYLDSDEELPTYTEPAEPQCEACNIK                                                                                                           |
| <i>Pseudomonas chloriraphis</i><br>B25  | Chitinase                               | WP_124321822.1  | MYDEKKYQYTSKKAMSDASEGVGNSLAAWNNSQSGGETFYVIFDSGVYTNSYWVERWHVPDRNLES<br>HENAWTYVRPATPQEMAIEHGNPTEGIVEPSDKTQILQPDDLTEKTYVDVNYFPDGSNSLSYTAARVCK<br>SMYNEYEQDRTRDRPHLKVSAYVTDWCQYDARLPPESTRALQPAEDVKPGRGFDLENIPPTAYDRLVFSFL<br>AIYGDKGKLGKEIEAVADGWNSQVEADEAITHGHIVPVDPYGDLGTTRNVAVPPDDRREVGPHNFLQYY<br>NQEAASGLLGGLRNLQERAKKVGHKLELAFSIGGWSMSGYFSPMVKDPQQRRAFVESVVDFFRRFPMF<br>TAVDIDWEYPGTSGEEGNEWDEEHDGPNYAILVGELRKALDGAFGTRARKEITIASSAVVGKLKKSNI<br>IENGLDNIFVMTYDFFGTGWADWIGHHTNLYAPPAENNPDRLYDLSADEAIQYLINDEGVPPGKIHLGFA<br>NYGRSCIGANLSDRTYTKPGMALGTMENGAPEFFCLLNNQFDCEHQLALGKNGFKLMTDTAADADILFN<br>PVGNYHISLDTPRVTVMQKGIYADKEKLGIFSWSGDQDDGLLANAAREGTGYIPKKGREVIDMGPLYNR<br>GELFELPATDQGKIKTAARKRKISKD |
| <i>Cronobacter sakazakii</i><br>wls2261 | Glycosyl hydrolase<br>family 18 protein | WP_241700376.1  | MATSKLIQGDSLTTETSNAADGFNPASETEKYSYTSARVAKPVYNKYKAANKPKVFGYYTDWSQYDGR<br>GDDSPANRGRGYDLAKVSPTAYDKIVFGFLGIVGDKGEKQYTIENAAARQTNKNTNEPTFLDPWGDFQSY<br>ENCGHSTSGWDIDPATVTQATTKGLLGGLRDLQKAKQQGHTLVLSMSGWTSNGFHEMSKTDSSR<br>KTFAAGVVKLFKQFPMFSEVDIDWEYPNAEGNGNPHGPEDGANYALLIAEMKKQLSAAGRSVDKISIA<br>AVVSTLEYSNVKALLDAGLYAINVMTYDFFGTPWADTLTHHTNLTPLTAGGWSIEAVVDYLIAEGFPSDRI<br>NIGYAGYTRNARNAVIESFSPLKGSYSPGNSTTGSFESGSTEWYDTIYNYLDLENQKGRNGFNVYTDKV<br>ANADYLYNPQSKLFMSLDTPRSVMKAKGQYAASRNGLGLFTWTIDQDNGVLVNAAREGLGYEIDTQTIDM<br>KPFYFEGINVAEPDNSGGDSEPQPTVNHAPVAAIQLR                                                                                                                                         |



**Table S5.** Amino acid sequences of chitinases used in phylogenetic analysis.

|                                             |                                         |                |                                                                                                                                                                                                                                                                                                                                                                                                                                                                                                                                                                                                                                                                                                                   |
|---------------------------------------------|-----------------------------------------|----------------|-------------------------------------------------------------------------------------------------------------------------------------------------------------------------------------------------------------------------------------------------------------------------------------------------------------------------------------------------------------------------------------------------------------------------------------------------------------------------------------------------------------------------------------------------------------------------------------------------------------------------------------------------------------------------------------------------------------------|
| <i>Photorhabdus khanii</i><br>HGB1456       | Glycosyl hydrolase<br>family 18 protein | WP 152962976.1 | MTDNSKYQYTCKKVMSDASENIGAPLTAWSNQSGGETYYVIFDGQVYKNTYWVERWHIPQRDNTPSYE<br>NAWSWVRAATAEEIAKHGNPKEGTVKPIPGDVAILKPDALTEETYQKEGYKPDGSGTNLAYTSARVCHSL<br>YNQYETDRTRPKVSAYITDWCQYDARLPPASKDSDKNEDGPGRGFNLADIPATAYDRLVFSFLGIYGDKG<br>SKKDRINLSAEGWNKQLRPEDPPITFGHIVPVDPYGDLGTTRNVGLPKEDTRDAGPNTFLPFYNQQAASG<br>LLGGLRNLQQAKLAGHRLAFAFSIGGWSMSGYFSPMLKDDAQRKTFIDSIVDFQRFPMFTAVIDIDWEY<br>PGAAGEVGNEFDPENDGPNYAILIKKLRQALDCAFGTSARKQITIASSAVVGKLKKSNIKELIHNLGNIFV<br>MTYDFFGNWAKHIGHHTNLYSAPYASDDPNRDYDISSDEAIKYLIEVEGVPPGKIHLGFANYGRSCIGAD<br>LKTRQYNRNPDPNPAPALGTMENGAPEFFCLLNNQFDCEQQLAWAKNGFKLMTDTATDADFLYNSTGGHF<br>ISLDTPRTVFKKGIYATEHKLGGIFSWSGDQDCGLLANAAREGAGYIPIKGKEKIDMGPLYNRGELVELP D<br>VNSRKK                  |
| <i>Pseudomonas chlororaphis</i><br>B25      | Glycosyl hydrolase<br>family 18 protein | WP 124321822.1 | MYDEKKYQYTSKKAMSDASEGVGNSLAAWNNQSGGETFYVIFDSGVYTN SYWVERWHVPDRNLESPS<br>HENAWTYVRPATPQEMAIEHGNPTEGIVEPSPDKTQILQPDDLTEKTYVDVNYFPDGSNSLSYTAARVCK<br>SMYNEYEQDRTRDRPHLKVSAYVTDWCQYDARLPPESRALQPAEDVKPGRGFDLENIPPTAYDRLVFSFL<br>AIYGDKGKLGKEIEAVADGWNSQVEADEAITHGHIVPVDPYGDLGTTRNVAVPPDDRREVGPHNFLQYY<br>NQEAASGLLGGLRNLQERAKKVGHKLELAFSIGGWSMSGYFSPMVKDPQQRRAFVESVVDFFRRFPMF<br>TAVDIDWEYPGTSGEEGNEWDEEHDGPNYAILVGELRKALDGAFGTRARKEITIASSAVVGKLKKSNIIRGL<br>IENGLDNIFVMTYDFFGTGWADWIGHHTNLYAPPYAENNPDRLYDLSADEAIQYLINDEGVPPGKIHLGFA<br>NYGRSCIGANLSDRITYTKPGMALGTMENGAPEFFCLLNNQFDCEHQLALGKNGFKLMTDTAADADILFN<br>PVGNYHISLDTPRTVMQKGIYADKEKLGIFSWSGDQDDGLLANAAREGTGYIPKKGREVIDMGPLYNR<br>GELFEL PATDQGKIKTAARKRKISKD |
| <i>Xenorhabdus nematophila</i><br>ATCC19061 | Glycosyl hydrolase<br>family 18 protein | WP 010846090.1 | MSQNVYRYPSIKAMSDASSEVGASLVAWQNSGGQTWYVIYDSAVFKNIGWVERWHIPDRNISPDLPVY<br>ENAWQYVREATPEEIADHGNPNTPDVPPGEKTEVLQYDALTEETYQKVGYKPDGSGTPLSYSSARVAKSL<br>YNEYEVDPENTEPLPKVSAYITDWCQYDARLSPETQDNTALTSDDAPGRGFDLEKIPPTAYDRLIFSMAV<br>NGDKGKLSERINEVVDGWNRQAEASSGQIAPITLGHIVPVDPYGDLGTTRNVGLDADQRRDASPKNFLQ<br>YYNQDAASGLLGGLRNLKARAKQAGHKLELAFSIGGWSMSGYFSVMAKDPEQRATFVSSIVDFRRFP<br>MFTAVIDIDWEYPGATGEEGNEFDPEHDGPNYVLLVKELREALNIAFGTRARKEITIACSAVVAKMEKSSFK<br>EIAPYLDNIFVMTYDFFGTGWAEYIGHHTNLYPPRYEYDGDNPPPPNPDRDMDYSADAEIRFLLSQGVQP<br>EKIHLGFANYGRSCLGADLTTRRYNRTGEPLGTMEKGAPEFFCLLNNQYDAEYEIARGKNQFELVTDTET<br>DADALFNADGGHWISLDTPRTLHKGIYATKMKLGGIFSWSGDQDDGLLANAHEGLGYLPVRGKEKID<br>MGP LYNKGRLIQLPKVTRRS          |

|                                                               |                                         |                |                                                                                                                                                                                                                                                                                                                                                                                                                                                                                                                                                                                                                                                                                                                                         |
|---------------------------------------------------------------|-----------------------------------------|----------------|-----------------------------------------------------------------------------------------------------------------------------------------------------------------------------------------------------------------------------------------------------------------------------------------------------------------------------------------------------------------------------------------------------------------------------------------------------------------------------------------------------------------------------------------------------------------------------------------------------------------------------------------------------------------------------------------------------------------------------------------|
| <i>Photorhabdus laumondii</i> subsp.<br><i>laumondii</i> TTO1 | Chitinase                               | AXG43067.1     | MVNKYTYTSSKSMSDISDIVGEPLTAWNQAGGQVYNVIFNSGVYTNTYWVERWHIPDPTAKEGTPHNA<br><br>WKYIRPATEDEIKQHGNPTDGRIDPTEDIPSPVLQPDASTEQTYQRPDVNFKPDGSAGNLSYTASRVC RPM<br><br>YNEYESDKSRPKLSAYITDWCQYDARLDGKNEDADQGRGRGFDLSTINVAAYDKLIFSFLGIYGDTGVKGD<br><br>KIKEVADGWNSQSEIKITEGHIVPLDPYGDLGTARNVGLPKESANTNINAGTFLPFYQQKKASGLLGGLRE<br><br>LQKTARLAGHKLELAFSIGGWSMSGYFSVMAADETKRGVFVDSIVDFFARFPMFSCVDIDWEYPGSPGE<br><br>DGNVYDPKDGEHYALLIKELRESLDSRFGREDRKEISACSGVKTKLATSNIAELVKNGLDNIYLMSYDYF<br><br>GTGWAPYIGHHTNLYSPKDPDPSGASDLSAEVAINYLHQELGIPLEKIHLYGYANYGRAGKGANLETREYN<br><br>KTGEALGTMEKGSPEFFDIVNNYLDSEHTLATGKNGFVLMTDTNADADFLFSETEGHFISLDTPRTVKQK<br><br>AEYVATNKLGGIFSWSGDQDCGLLANAAREGMGYIAKSNDETIDMGPLYNPGKPYYLK SIG                        |
| <i>Photorhabdus akhurstii</i><br>DSM 15138                    | Glycosyl hydrolase<br>family 18 protein | WP 214039151.1 | MVNKYTYTSSKSMSDISDIIGEPLTAWKNQAGGQVYNVIFNGGVYTNTYWVERWHIPDPTAKEGTPHNA<br><br>WKYIRQATEEEIKEHGNPTDGRVDPTEDIPSPVLQPD DITEKTYQRPDVNFKPDGSAGNLSYTATRVCRPM<br><br>FNEYESDKSRPKLSAYITDWCQYDARLDGKDDEADDRGRGFDLSTINVTAYDKLIFSFLGIYGDTGVK GK<br><br>TIKEVADGWNSQSEIKITEGHIVPLDPYGDLGTARNVGLPKESANTDINAGTFLPFYQQKKASGLLGGLRE<br><br>LQKTARLAGHKLELAFSIGGWSMSGYFSVMAADETKRGVFVDSIVDFFERFPMFSCVDIDWEYPGSPGE<br><br>DGNVYDPKDGEYYALLIKELRESLDSRFGREDRKEISACSGVKTKLETSNIAELVKNGLDNIYLMSYDYF<br><br>GTGWAPYIGHHTNLYSPKDPDPSGASDLSAEVAINYLHQDLGIPLEKIHLYGYANYGRAGKGAKLETREYN<br><br>KTGDALGTMEKGSPEFFDIVNNYLDSEHTLATGKNGFVLMTDTNADADFLFSETAGHFISLDTPRTVKQK<br><br>AEYVAKNKLGGIFSWSGDQDCGLLANAAREGMGYVAKSNDETIDMGPLYNPGKPYYLK SIG                       |
| <i>Yersinia entomophaga</i><br>MH96                           | Chitinase                               | ANI28955.1     | MVNKYTYTSSKAMSDISDVIGEPLAAWDSQVGGRVFNVIFD GKVYTNTYWVERWQVPGIGSSDGNPHN<br><br>AWKFVRAATADEINKIGNPTTADV KPTENIPSPILVEDKYTEETYSRPDVNFKEDGSQGNLSYTATRV CAP<br><br>MYNHYVGDKTKPKLSAYITDWCQYDARLDGGGSKEEERGRGFDLATLMQN PATYDRLIFSFLGICGDIG<br><br>NKSKKVQEVWDGWNAQAPSLGLPQIGKGHIVPLDPYGDLGTARNVGLPPESADTSIESGTFLPYYQQNR<br><br>AAGLLGGLRELQKKAHAMGHKLDLAFSIGGWSLSSYFSALAENPDERRVFVASVVDFFVRFP MFSCVDI<br><br>DWEYPGGGGDEGNISSDKDGENYVLLIKELRSALDSRFGYSNRKEISACSGVKAKLKKSNIDQLVANGL<br><br>DNIYLMSYDFFGTIWADYIGHHTNLYSPKDPGEQELFDLSAEAAIDY LHNELGIPMEKIHLYGYANYGRSAV<br><br>GGDLTTRQYTKNGPALGTMENGAPEFFDIVKNYMDAEHSLSMGKNGFVLMTDTNADADFLFSEAKGHF<br><br>ISLDTPRTVKQKGEYAAKNKLGGVFSWSGDQDCGLLANAAREGLGYVADSNQETIDMGPLYNPGKEIYL<br><br>KSISEIKSK |

|                                                               |                                                 |                |                                                                                                                                                                                                                                                                                                                                                                                                                                                                                                                                                                                                                                                                                                                                        |
|---------------------------------------------------------------|-------------------------------------------------|----------------|----------------------------------------------------------------------------------------------------------------------------------------------------------------------------------------------------------------------------------------------------------------------------------------------------------------------------------------------------------------------------------------------------------------------------------------------------------------------------------------------------------------------------------------------------------------------------------------------------------------------------------------------------------------------------------------------------------------------------------------|
| <i>Yersinia nurmii</i><br>CIP110231T                          | Insecticidal toxin<br>complex chitinase<br>Chi2 | WP 049597577.1 | MVNKYTYTSSKAMSDISDVIGEPLAAWNSQVGGRVFNVIFDSKVYTNTYWVERWQVPGIGSSDGNPHN<br><br>AWKFVRAATVDEINKIGNPTTADV KPTENIPSPILVEDKYTEETYSRPDVNYKEDGSQGNLSYTATRVCAP<br><br>MYNHYVGDKTKPKLSAYITDWCQYDARLDGGGSKEEERGRGFDLATLMQNPATYDRLIFSFLGICGDIG<br><br>DKSKKVQEVWDGWNAQASSLGLPQISKGHIVPLDPYGDLGTARNVGLPLESADTSIESGTFLPYYYQQR<br><br>AAGLLGGLRELQKKAHAMGHKLDLAFSIGGWSLSSYFSALAENPDERRVFVASVVDFFERFPMFSCVDID<br><br>WEYPGGGGEAGNISSDKDGENYVLLIKELRSALDSRFGYSNRKEISIACSGVKAKLKSNIDQLVANGLD<br><br>NIY<br><br>LMSYDFFGTIWADYIGHHTNLYSPKDPGEQELFDLSAEAAIDYLNELAIPEMKIHLGYANYGRSAVGGD<br><br>LTTRQYTKDGPALGTMENGAPEFFDIVRNYMDVEHSLSTGKNGFVLMTDNADADFLFSEAKGHFISLD<br><br>TPRTVKQKGEYAAKNKLGGVFSWSGDQDCGLLANAAREGLGYVTQSNQETIDMGPLYNPGKEIYLSIS<br><br>EIKSK |
| <i>Xenorhabdus lircayensis</i><br>VLS                         | Glycosyl hydrolase<br>family 18 protein         | WP 198689572.1 | MSKITQIDPLSEESYRLDNFKPATETTKYSYTSGRVALPVYNKYDVKNRPKVIGYYTDWSQYDGRLQGNQ<br><br>TPSARGRGIDLQHLLDNPFAYDKLIIGFCGILGDKGEKASLISRAAPKFDRHKNGEVTFTDEWGDCQSYVN<br><br>CTYPGWQDIHMPRDFNQANSMGILGGLAKVQGAARAQGHDLAMSFVGGWTMSNGFFHMVRDNQLK<br><br>SNFISSLIDIFRRFPMFTEVDIDWEYPGAPGNQNPHDSDDGKYIYSLIRDLSSAFKNEGRSDIKISIACSAVPD<br><br>IMEKSSIPELLNAGLYGVNVMTYDFFGTPWADKLRHHTNLRRYPGSENSVEKAVEYLLSVGPVPSQAINIG<br><br>YAGYSRNAKNTNIDSYSPLSGSYNHDKGTTTGTGFESGSTEWYDTIYNYIDLESRKDRNNFTLYTDEVAD<br><br>ADYLYNQDSKLFLSIDTPRTVKAKAKYALEKNLGGVFTWTADQDRGLLVNAAREGLECPLLIKIDMEPF<br><br>YYKGKTSK                                                                                                                                                             |
| <i>Photorhabdus laumondii</i> subsp.<br><i>laumondii</i> TTO1 | Chitinase                                       | AXG42878.1     | MSKIIQTDSFSEQSYQIDNFPSTETINFSYTSGRIALPVYNKYDTRNKPKVFGYYTDWSQYDGRLQGNQ<br><br>DPIRRGRGIDLQHLLDNPFAYDKLVIGFCGILGDEGEKKQQIKEQAPLFARTNNGEVTFTDAWGDCQSYQN<br><br>CTYSGWQDIQMPRDFDQSKSMGVLGGLAKVQQAQAQGHDLMSFVGGWTMSNGFYAMVRDETLKS<br><br>YFCSSLVDIFQRFPMTFTEIDIDWEYPGVAGNEGNMYASDDGDYVYSLIKDLTAAAFKEAGRSDIKISIACSAV<br><br>PEKMEKSKIPELLQVGLYGVNVMTYDFFGTPWAERLLHHTNLRNYPGSENSVEKAVEYLLSLGVPASAIN<br><br>IGYTGYSRNGRNTVIDSYSPLSGSYDPGYVPKKEPKITTTGSFESGTTEWYDTIYNYLDLEEKGRNNFDL<br><br>YTDEIADADYLYNKDSQLFISLDTPRSVKSQAQYALEKNLGGIFTWTADQDRGLLVNAAREGLGCELITE<br><br>KIDMTPFYFKGVNVEPVDPIHPDTGSDYPVWDANRAYKAGDRVSWNNQNWEAKWWNRGTEPDGAGT<br><br>SDAYPWVKIA                                                                                   |

|                                                              |                                         |                |                                                                                                                                                                                                                                                                                                                                                                                                                                                                                                                                                                                                                                                                                                         |
|--------------------------------------------------------------|-----------------------------------------|----------------|---------------------------------------------------------------------------------------------------------------------------------------------------------------------------------------------------------------------------------------------------------------------------------------------------------------------------------------------------------------------------------------------------------------------------------------------------------------------------------------------------------------------------------------------------------------------------------------------------------------------------------------------------------------------------------------------------------|
| <i>Yersinia proxima</i><br>IP37424                           | Glycosyl hydrolase<br>family 18 protein | WP 227731375.1 | MSLLIQYDEATEKSYDLDGFSAKTETNNYSYTSARVAKSVYNKYNVKGRAKVGYYTDWSQYDGRLDN<br>NQQKSLRGRGVDLALVDPLAYDKLIIGFCGIVGDQGDQKHQLIAQQSPLFGRFYPGEASFIDAWGDCQSYR<br>NCGFPAYQDIPMPQGFNQLNAMGVLGGLRDLQRKALEQGHELALSFSIGGWTMSNAFHDMVRDIHLRQ<br>VFCRSVVDIFTRFPMFSEVDIDWEYPGSAGNNNPFDENDGKCYALLIKELKGMLVAANRPDVKISIACSAI<br>PAIMAKSNIPELISAGLYGLNVMTYDFFGTPWSELVTHHTNLHSTPETSYSVESAVDYLLAQGVPAEAINIG<br>YAGYSRNAKMAKLSLSPLSGNYNPGDGNTTGTGTFDSGSTEWYDIINNYLDLENRKGRNGFNLYTDEVAD<br>ADYLYNPESSLFISIDTPRTVKAKAEYVKKNLGGIFTWTADQDQGLLVNAAREGLECPVVKQNIIDMSPF<br>YFKGINVTPSPIEAIRTVITGPTISKIGDKVTLSENSSSATPGSLQFTWITPDSVNPDAKDKSVISFIVPSVNS<br>SMEKLQFMLSVTDGVDHATVSHSISVVSPPDYPEWQKEATYIASDRVSWKGDNWEAKWWTYAAEPGTA<br>DPTDAYPWKKLI |
| <i>Cronobacter sakazakii</i><br>wls2261                      | Glycosyl hydrolase<br>family 18 protein | WP 241700376.1 | MATSKLIQGDSLTETSNAADGFNPASETEKYSYTSARVAKPVYNKYKAANKPKVFGYYTDWSQYDGRQLQ<br>GDDSPANRGRGYDLAKVSPTAYDKIVFGFLGIVGDKGEKQYTIENAARQTNKNTNEPTFLDPWGDFQSY<br>ENCGHTTSGWDIDPATVTQATTKGLLGGLRDLQQKAKQQGHTLVLSMSIGGWTMSNGFHEMSKTDSSR<br>KTFAAGVVKLFKQFPMFSEVDIDWEYPNAEGNGNPHGPEDGANYALLIAEMKKQLSAAGRSDVKISIASS<br>AVVSTLEYSNVKALLDAGLYAINVMTYDFFGTPWADTLTHHTNLPLTAGGWSIEAVVDYLIAEGFPSDRI<br>NIGYAGYTRNARNAVIESFSPLKGSYSPGNGTTTGSFESGSTEWYDTIYNYLDLENQKGRNGFNVYTDKV<br>ANADYLYNPQSKLFMSLDTPRSVKAKGQYAASRNLGGLFTWTIDQDNGVLVNAAREGLGYEIDTQTIDM<br>KPFYFEGINVAEPDNSGGDSEPQPTVNHAPVAAIQLR                                                                                                                                 |
| <i>Photorhabdus laumondii</i> subsp.<br><i>laumondii</i> DJC | Chitinase                               | AXG43070.1     | MATSKLIQGDSLTETSNAADGFNPASETEKYSYTSARVAKPVYNKYKAANKPKVFGYYTDWSQYDGRQLQ<br>GDDSPANRGRGYDLAKVSPTAYDKIVFGFLGIVGDKGEKQYTIENAARQTNKNTNEPTFLDPWGDFQSY<br>ENCGHTTSGWDIDPATVTQATTKGLLGGLRDLQQKAKQQGHTLVLSMSIGGWTMSNGFHEMSKTDSSR<br>KTFAAGVVKLFKQFPMFSEVDIDWEYPNAEGNGNPHGPEDGANYALLIAEMKKQLSAAGRSDVKISIASS<br>AVVSTLEYSNVKALLDAGLYAINVMTYDFFGTPWADTLTHHTNLPLTAGGWSIEAVVDYLIAEGFPSDRI<br>NIGYAGYTRNARNAVIESFSPLKGSYSPGNGTTTGSFESGSTEWYDTIYNYLDLENQKGRNGFNVYTDKV<br>ANADYLYNPQSKLFMSLDTPRSVKAKGQYAASRNLGGLFTWTIDQDNGVLVNAAREGLGYEIDTQTIDM<br>KPFYFEGINVAEPDNSGGDSEPQPTVNHAPVAAIQLR                                                                                                                                 |

|                                         |              |            |                                                                                                                                                                                                                                                                                                                                                                                                                                                                                                                                                                                                    |
|-----------------------------------------|--------------|------------|----------------------------------------------------------------------------------------------------------------------------------------------------------------------------------------------------------------------------------------------------------------------------------------------------------------------------------------------------------------------------------------------------------------------------------------------------------------------------------------------------------------------------------------------------------------------------------------------------|
| <i>Yersinia entomophaga</i><br>MH96     | Chitinase    | ANI28952.1 | MESEMEKEEEKSNLIYDKDPGYVWDNKNECEGAAEETYQELNYEPSISADKLTWTPTRLAKTVFNTYEDD<br>DDFNVLCYFTDWSQYDPRIINKEIRD TGGRSADILRLNTPDGRPFKRLIYSFGGLIGDKKYSADGNASIAVR<br>LGVATDPDDAIA NHKGKTIPVDPDGAVLASINCGFTKWEAGDANERYNQEKAKGLLGGFRLLHEADKEL<br>EFSLSIGGWSMSGLFSEIAKDEILRTNFVEGIKDFQRFPMFSHLDIDWEYPGSIGAGNPNSPDDGANFAILI<br>QQITDAKISNLKGISIASSADPAKIDAANIPALMDAGVTGINLMTYDFFTLGDGKLSHHTNIYRDPSDVYSK<br>YSIDDAVTHLIDEKKVDPKAIFIGYAGYTRNAKNATITTSIPSEEALKGYTDANQTLGSFEYSVLEWTDIIC<br>HYMDFEKGEGRNGYKLVHDKVAKADYLYSEATKVFIISLDTPRSVRDKGRYVKDKGLGGLFIWSGDQDN<br>GILTNA AHEGLKRRIKNKVIDMTPFYLDSD EELPTYTEPAEPQCEACNIK |
| <i>Xenorhabdus nematophila</i> HB310    | Chitinase 60 | AGK44778   | MPSSKNSNLNDNPFIIPDPGTETKPGDIWGAGATEKTYEVNEFDPSTADSDLSYTPGRIAKNVFNHYESV<br>SGFEVFGYLSDWGIYDSRYGNAPGDTDVDYGE GGRGTDIMRLLDEGSPLPYFDRIIVGFAGIIGDEGLKEA<br>TINQA AIDFKIASDEDDLPNHKGEATFTDYWGDTGAYLNCGFPGWKETDFTPEN AQGVLGALVKLHKKY<br>PDMPIGLSLGGWSMSQAFHFIAQEPELRQRLAQSLKKIFDLFPMFTDLDL DWEYPNYKGEEHNSYDEEDP<br>ENFAELIKEIRKELPDITISIATIAVPAGLEAANIPLLLEAGVDKLNVMTYDFFGTPWAETLGHHTALKLNP D<br>KEETQNSVDKAVNYLLDELHVEPKKINIGYAGYTRNAQQASIPSISPIYGRYTPRGDIALGSFESGSTEWPD<br>LLRNYLDSNMDGINNFTVYTDEVAKAEFLYNQESRLFMSLDTPYSVKEKAQYVKEKGLGGMFIWMIDH<br>DNGLLTNAAREGLGAATVGTPRVDMAPLCLSA AEKAKNRTK           |
| <i>Pseudomonas fluorescens</i><br>MP-13 | Chitinase    | AIU96334.1 | MSKFDFTLLKSAVSDAASLMPSIAGKKILMGIWHNWPAGPSDGYQRGQFANIALHDVPKDYNV VAVAFM<br>KGNGIPTFNPYNLSDAEFRRQVGVLNSQGRAVLISLGGADAHIELHKGNEQPLANEIIRLVSTYGF DGLDI<br>DLEQSAIDFADNKTVLPAALKLVKDHYAGEGKHFIIMAPEFPYLTTAGKYVGYLQALEGYYDFIAPQYYN<br>QRGDGIWVQEANNNGAWIAQNNDAMKEDFLYYLTESLVSGTRGFTRIPADKFVIGLPD NVDA AATGYV<br>INPAAVVNAFKRLDAKGLSIKGLMTWSVNWDNAVNDHVPYNW EFSRRYGPLINGKRLSWHEEALAAT<br>EVANTL                                                                                                                                                                                                           |

|                                        |                                         |                |                                                                                                                                                                                                                                                                                                                                                                                                                                                                                                                                                     |
|----------------------------------------|-----------------------------------------|----------------|-----------------------------------------------------------------------------------------------------------------------------------------------------------------------------------------------------------------------------------------------------------------------------------------------------------------------------------------------------------------------------------------------------------------------------------------------------------------------------------------------------------------------------------------------------|
| <i>Pseudomonas protegens</i><br>CHA0   | Glycosyl hydrolase<br>family 18 protein | WP 015634913.1 | MDKIDFALIKSQAADAASLMPSIAGKKVLMGFWHNWAAGHSDGYQQGQFANLDLVDVPKEYNVVAVAF<br>MKGNGIPTFKPYNLSDAEFRQVGVLNSQGRAVLISLGGADAHIELHKGNEQPLANEIIRLVETYGFDGLD<br>IDLEQSAIDFADNKSVLPAALKLVKDHYAGQGKHFIISMAPEFPYLTSNGKYVAYLQALEGYIDFVAPQFY<br>NQGGDGLWVQEANGGQGAWIAQNNDAMKEDFLYYLSESLASGTRGFTRIAADKLVIGLPSNVDAAATG<br>YVIDPSAVSNAFKRLQGAGHAIKGLMTWSVNW DAGISRQGV PYNWEFRHRYAPLIHGDGGEPERPGAPG<br>NLMVLGTSRSSVNL SWGVSGSVRPVEFY TLYRDGN AVARTPSPGFEDQGLSADTQYSYFVTATDTQQQES<br>LPSRSVSARTAGGAVDPSFPEWRTSQHYLREDGV TYEGNRYLCLQEHTSNPGWTPSVAFTLWSKVLQERH<br>G           |
| <i>Serratia marcescens</i><br>GEI      | Chitinase B                             | ACX42072.1     | MSTRKAVIGYYFIPTNQINNYTESDTSIVPPVSNITPAKAKQLTHINFSFLDINSNLECAWDPATNDAK<br>ARDVVKRLTALKAHNP NLRIMFSIGGWYY SNDLGVSHANYVNAVKT PASRTKFAQSCVRIMKDYGFDGV<br>DIDWEYPQAAEVDGFIAALQEIRTLNQQTVADGRQALPYQLTIAGAGGAFFLSRYYSKLAQIVAPLDYIN<br>LMTYDLAGPWEKITNHQAALFGDAAGPTFYNALREANLGWSWEELTRAFSPFSLTVDAAVQQHLMME<br>GVPSAKIVMGVPFYGRAFKGVSGGNGGQYSSHSTPGEDPY PSTDYWLVGCEECVRDKDPRIAS YRQLEQ<br>MLQGN YGYQRLWNDKTKTPYLYHAQNGLFVTYDDAESFKYKAKYIKQQQLGGVMFWHLGQDNRNGD<br>LLAALDRYFNAADYDDSQLDMGTGLRYTGVGPGNLPIMTAPAYVPGTIYAQGALVSYQGYVWQTKWGY<br>ITSAPGSDSAWLKVGRVA  |
| <i>Serratia proteamaculans</i><br>336x | ChiB                                    | AGF70636.1     | MSERKAVIGYYFIPTNQINNYTESDTSIVPPVSNITPAKAKQLTHINFSFLDINSNLECAWDPATNDAK<br>ARDVVSRLTALKAHNP SLRIMFSIGGWYY SNDLGVSHANYVNAVKT PAARTKFAQSCVRIMKDYGFDGV<br>DIDWEYPQSSEVDGFVAALQEIRTLNQQTLTDGRQALPYQLTIAGAGGAFFLSRYYSKL PQIVASLDYINL<br>MTYDLAGPWEKITNHQAGLFGDSAGPTFYNALREANLGWSWEELTRAFSPFSLTVDAAVQQHLMLEG<br>VPSNKIVMGVPFYGRAFKGVSSSNGGQYSSHSTPGEDPFP GTDYWLVGCEECVRDKDPRIAS YRQLEQM<br>LLGNYGYQRLWNDKTKTPYLYHAANGLFVTYDDVESFKYKAKYIKQQQLGGVMFWHLGQDNRNGDL<br>LASLDRYFNAADYDDSQLDMGTGLRYTGVGPGNLPIMSAPAYVAGTTYNQ GALVSYLGYVWQTKWGYI<br>TSVPGSDSAWLKVGRVA |

|                                  |                                         |                |                                                                                                                                                                                                                                                                                                                                                                                                                                                                                                                                                                                                                                                                                                                                              |
|----------------------------------|-----------------------------------------|----------------|----------------------------------------------------------------------------------------------------------------------------------------------------------------------------------------------------------------------------------------------------------------------------------------------------------------------------------------------------------------------------------------------------------------------------------------------------------------------------------------------------------------------------------------------------------------------------------------------------------------------------------------------------------------------------------------------------------------------------------------------|
| <i>Bacillus pumilus</i><br>MCB-7 | Chitinase A                             | ALX35002.1     | MNKVLVNKSKKFLVLSFISAMILSLSLFNGEVAKASSDKSYKIIGYYPSWGAYGRDYQVWMDASKVSHI<br>NYAFADICWEGRHGNPDPTGPNPQTWSCQDENGVIDAPYGSIVMGDPWIDAQKSNAGDAWDEPIRGNSK<br>QLLKLKKNHPLKKTfISGGGWSWSNRFSOVAADPAARENFAASAVNLLRKYGFDGVDLDWEYPVSGGL<br>PGNSTRPEDKRNYTLLLQDVPKKLDAAEAKDGKKYLLTIASGASPEYVSNTELD KIAETVDWINSMTYDF<br>NGGWQSINAHNAPLFYDPKAKEAGVPNAETFNIESTVKRYKEAGVKADKLVLGTPFYGRGWSNCEPGD<br>NGEYQKCGPGKEGTWEKGVFDISDLEKNYINKNGYKRYWNDRAKVPFLYYAENGNFITYDDEESYGYK<br>TDLIQSNGLSGAMFWDFSGDSNQTLNKL AADLGFA PGGRNPEPPSSAPENVRVTEKTAASVSLAWDAPS<br>DGANIAEYVLSYKYGSISVKETSAKIGQLKPNTTCSFTVSAKDADGKLHTGPTIEAATNSDQTCGYNEWK<br>DTAVYSVGDRVVFNGKVYEAKWWTKGEQPDQSGESGVWKLIGDCK                                                                                      |
| <i>Bacillus thuringiensis</i>    | Chitinase                               | AAL17867.1     | MAMRSQKFLLLLL SLLLFLPLFTNFITPNLALADSPKQSQKIVGYFPSWG VYGRNYQVADIDASKLTHLN<br>YAFADICWNGKHGNPSTHPDNPNKQTWNCKESGVPLQNKEVPNGTLVLGEPWADVTKSYPVSGTTWED<br>CDKYARCGNFGELKRLKAKYPHLKTIISVGGWTWSNRFSDMAADEKTRKVF AESTVAFLRAYGFDGVDL<br>DWEYPGVETIPGGSYRPEDKQNFTLLLQDVRNALNKAGAEDGKQYLLTIASGASQRYADHTELKKISQIL<br>DWINIMTYDFHGGWEATSNHNAALYKDPNDPAANTNFYVDGAINVYTNEGVPVDKLVLGVPFYG RGW<br>KSCGKENNGQYQPCPKGSDGKLASKGTWDDYSTGDTGVYDYGDLAANYVNKNGFVRYWNDTAKVPY<br>LYNATTGTFISYDDNESMKYKTDYIKTKGLSGAMFWELSGDCRTSPKYSCSGPKLLDTLVKELLGGPINQ<br>KDTEPPTNVKNIVVTNKNSNSVQLNWTASTDNVGVTEYEITAGEEKWSTTTNSITIKNLKPNT EYTFSIIAK<br>DAAGNKSQPTALTVKTDEANTTPPDGNGTATFSVTSNWGSGYNFSIIKNNGTTPIKNWKLEFDYSGNLTQ<br>VWDSKISSKTNNHYVITNAGWNGEIPSGGSITIGGAGTG NPAELLNAVISEN |
| <i>Bacillus cereus</i><br>VD133  | Glycosyl hydrolase<br>family 18 protein | WP 016111320.1 | MRSQKFLLLLL SLLLFLPLFTNFITPNLALADSPKQSQKIVGYFPSWG VYGRNYQVADIDASKLTHLN<br>YAFADICWNGKHGNPSTHPDNPNKQTWNCKESGVPLQNKEVPNGTLVLGEPWADVTKSYPGSGTTWEDCD<br>KYARCGNFGELKRLKAKYPHLKTIISVGGWTWSNRFSDMAADEKTRKVF AESTVAFLRAYGFDGVDLD<br>WEYPGVETIPGGSYRPEDKQNFTLLLQDVRNALNKAGAEDGKQYLLTIASGASQRYADHTELKKISQILD<br>WINIMTYDFHGGWEATSNHNAALYKDPNDPAANTNFYVDGAINVYTNEGVPVDKLVLGVPFYGRGWKS<br>CGKENNGQYQPCPKGSDGKLASKGTWDDYSTGDTGVYDYGDLAANYVNKNGFVRYWNDTAKVPYLY<br>NATTGTFISYDDNESMKYKTDYIKTKGLSGAMFWELSGDCRTSPKYSCSGPKLLDTLVKELLGGPINQKD<br>TEPPTNVKNIVVTNKNSNSVQLNWTASTDNVGVTEYEITAGEEKWSTTTNSITIKNLKPNT EYTFSIIAKDA<br>AGNKSQPTALTVKTDEANTTPPDGNGTATFSVTSNWGSGYNFSIIKNNGTTPIKNWKLEFDYSGNLTQV<br>WDSKISSKTNNHYVITNAGWNGEIPSGGSITIGGAGTG NPAELLNAVISEN    |
